# Supplementary material for: The Impact of Specialised Heart Failure Outpatient Care on the Long-Term Application of Guideline-Directed Medical Therapy and on Prognosis in Heart Failure with Reduced Ejection Fraction
Source: MDPI journal article supplement (doi:10.3390/diagnostics14020131), 2024-01-06
Supplement: s1 [file s1]

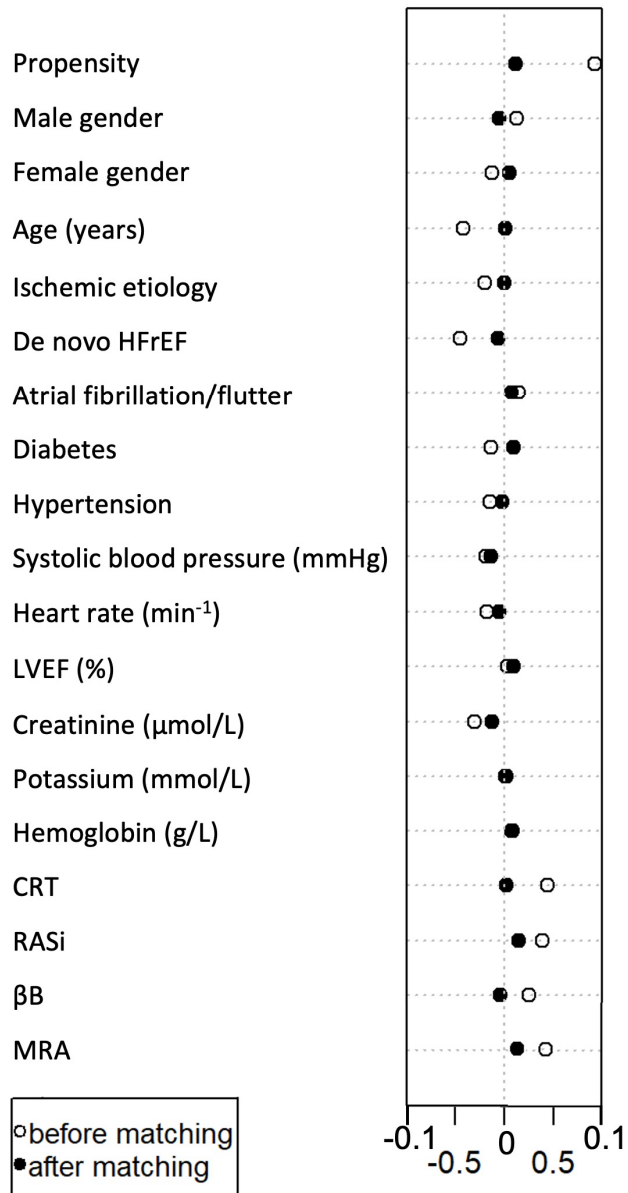

**Figure S1.** Dot plot of propensity-score matching.

βB: beta-blocker; CRT: cardiac resynchronization therapy; HFrEF: heart failure with reduced ejection fraction; LVEF: left ventricular ejection fraction; MRA: mineralocorticoid receptor antagonist; RASi: renin-angiotensin system inhibitor.

**Table S1.** Main baseline characteristics of the study population after propensity-score matching.

| Parameters                                                            | PSM total cohort<br>( <i>n</i> = 168) | PSM HFOC<br>( <i>n</i> = 84) | PSM non-HFOC<br>( <i>n</i> = 84) | <i>p</i> -Value |
|-----------------------------------------------------------------------|---------------------------------------|------------------------------|----------------------------------|-----------------|
| Male gender, <i>n</i> (%)                                             | 132 (79)                              | 65 (77)                      | 67 (80)                          | 0.851           |
| Age, median [IQR], years                                              | 63 [50-69]                            | 64 [52-70]                   | 62 [48-68]                       | 0.623           |
| Previous hospitalization primarily due to heart failure, <i>n</i> (%) | 70 (42)                               | 37 (44)                      | 33 (39)                          | 0.639           |
| De novo HfrEF, <i>n</i> (%)                                           | 48 (29)                               | 23 (27)                      | 25 (30)                          | 0.865           |
| Ischemic etiology, <i>n</i> (%)                                       | 74 (44)                               | 37 (44)                      | 37 (44)                          | 1.000           |
| LVEF, median [IQR], %                                                 | 25 [20-30]                            | 25 [20-30]                   | 25 [19-30]                       | 0.611           |
| Heart rate, median [IQR], min <sup>-1</sup>                           | 87 [71-100]                           | 85 [70-100]                  | 88 [73-100]                      | 0.495           |
| Systolic blood pressure, median [IQR], mmHg                           | 118 [102-137]                         | 117 [102-137]                | 120 [103-135]                    | 0.586           |
| Distance from HFOC, median [IQR], km                                  | 11 [5-67]                             | 13 [5-73]                    | 8 [6-54]                         | 0.578           |
| <b>Comorbidities</b>                                                  |                                       |                              |                                  |                 |
| Diabetes, <i>n</i> (%)                                                | 66 (39)                               | 35 (42)                      | 31 (37)                          | 0.636           |
| Hypertension, <i>n</i> (%)                                            | 107 (64)                              | 53 (63)                      | 54 (64)                          | 1.000           |
| Atrial fibrillation/flutter, <i>n</i> (%)                             | 69 (41)                               | 36 (43)                      | 33 (38)                          | 0.754           |
| <b>Laboratory parameters at hospital discharge</b>                    |                                       |                              |                                  |                 |
| creatinine, median [IQR], μmol/L                                      | 111 [85-147]                          | 112 [86-155]                 | 106 [83-145]                     | 0.499           |
| eGFR, median [IQR], mL/min/1.73m <sup>2</sup>                         | 61 [39-83]                            | 58 [38-79]                   | 63 [42-86]                       | 0.423           |
| potassium, median [IQR], mmol/L                                       | 4.4 [4.1-4.7]                         | 4.4 [4.1-4.7]                | 4.4 [4.1-4.7]                    | 0.975           |
| hemoglobin, median [IQR], g/L                                         | 122 [108-138]                         | 124 [108-139]                | 121 [106-138]                    | 0.685           |
| <b>Medical and device therapy at hospital discharge</b>               |                                       |                              |                                  |                 |
| RASi, <i>n</i> (%)                                                    | 153 (91)                              | 78 (93)                      | 75 (89)                          | 0.590           |
| ACEi/ARB, <i>n</i> (%)                                                | 123 (73)                              | 58 (69)                      | 65 (77)                          | 0.296           |
| ARNI, <i>n</i> (%)                                                    | 30 (18)                               | 20 (24)                      | 10 (12)                          | 0.069           |
| βB, <i>n</i> (%)                                                      | 149 (89)                              | 74 (88)                      | 75 (89)                          | 1.000           |
| MRA, <i>n</i> (%)                                                     | 160 (95)                              | 81 (96)                      | 79 (94)                          | 0.720           |
| Triple therapy, <i>n</i> (%)                                          | 136 (81)                              | 68 (81)                      | 68 (81)                          | 1.000           |
| SGLT2i, <i>n</i> (%)                                                  | 21 (13)                               | 12 (14)                      | 9 (11)                           | 0.642           |
| TD RASi, <i>n</i> (%)                                                 | 43 (26)                               | 19 (23)                      | 24 (29)                          | 0.480           |
| TD ACEi/ARB, <i>n</i> (%)                                             | 37 (22)                               | 16 (19)                      | 21 (25)                          | 0.457           |
| TD ARNI, <i>n</i> (%)                                                 | 6 (4)                                 | 3 (4)                        | 3 (4)                            | 1.000           |
| TD βB, <i>n</i> (%)                                                   | 36 (21)                               | 23 (27)                      | 13 (15)                          | 0.090           |
| TD MRA, <i>n</i> (%)                                                  | 120 (71)                              | 58 (69)                      | 62 (74)                          | 0.609           |
| TD Triple therapy, <i>n</i> (%)                                       | 11 (7)                                | 5 (6)                        | 6 (7)                            | 1.000           |
| CRT-P/CRT-D, <i>n</i> (%)                                             | 27 (16)                               | 14 (17)                      | 13 (15)                          | 1.000           |
| ICD, <i>n</i> (%)                                                     | 48 (29)                               | 27 (32)                      | 21 (25)                          | 0.393           |

ACEi: angiotensin-converting enzyme inhibitor; ARB: angiotensin receptor blocker; ARNI: angiotensin receptor neprilysin inhibitor; βB: beta-blocker; CRT-P/CRT-D: cardiac resynchronization therapy pacemaker/defibrillator; eGFR: estimated glomerular filtration rate; HFOC: heart failure outpatient care; HfrEF: heart failure with reduced ejection fraction; ICD: implantable cardioverter defibrillator; [IQR]: interquartile range; LVEF: left ventricular ejection fraction; MRA: mineralocorticoid receptor antagonist; PSM: propensity-score matching; RASi: renin-angiotensin system inhibitor; SGLT2i: sodium-glucose cotransporter 2 inhibitor; TD: target dose.

**Table S2.** Medical and device therapy at 1 year in the total cohort and after propensity-score matching.

|                                 | Total cohort<br>( <i>n</i> = 191) | HFOC<br>( <i>n</i> = 95) | non-HFOC<br>( <i>n</i> = 96) | <i>p</i> -Value | PSM total<br>cohort<br>( <i>n</i> = 125) | PSM HFOC<br>( <i>n</i> = 67) | PSM non-<br>HFOC<br>( <i>n</i> = 58) | <i>p</i> -Value |
|---------------------------------|-----------------------------------|--------------------------|------------------------------|-----------------|------------------------------------------|------------------------------|--------------------------------------|-----------------|
| RASi, <i>n</i> (%)              | 163 (85)                          | 89 (94)                  | 75 (78)                      | 0.007           | 110 (88)                                 | 64 (96)                      | 46 (79)                              | 0.011           |
| ACEi/ARB, <i>n</i> (%)          | 118 (61)                          | 55 (58)                  | 64 (67)                      | 0.182           | 81 (65)                                  | 43 (64)                      | 38 (65)                              | 1.000           |
| ARNI, <i>n</i> (%)              | 45 (24)                           | 34 (36)                  | 11 (11)                      | <0.001          | 29 (23)                                  | 21 (32)                      | 8 (14)                               | 0.033           |
| βB, <i>n</i> (%)                | 170 (89)                          | 89 (94)                  | 81 (84)                      | 0.062           | 114 (91)                                 | 64 (96)                      | 50 (86)                              | 0.111           |
| MRA, <i>n</i> (%)               | 158 (83)                          | 90 (95)                  | 68 (71)                      | <0.001          | 108 (86)                                 | 65 (97)                      | 43 (74)                              | <0.001          |
| Triple therapy, <i>n</i> (%)    | 139 (73)                          | 84 (88)                  | 55 (57)                      | <0.001          | 99 (79)                                  | 61 (91)                      | 38 (66)                              | <0.001          |
| SGLT2i, <i>n</i> (%)            | 25 (13)                           | 17 (18)                  | 8 (8)                        | 0.056           | 17 (14)                                  | 11 (16)                      | 6 (10)                               | 0.434           |
| TD RASi, <i>n</i> (%)           | 80 (42)                           | 46 (48)                  | 34 (35)                      | 0.079           | 54 (43)                                  | 33 (49)                      | 21 (36)                              | 0.153           |
| TD ACEi/ARB, <i>n</i> (%)       | 59 (31)                           | 30 (31)                  | 29 (30)                      | 0.876           | 41 (33)                                  | 24 (36)                      | 17 (29)                              | 0.453           |
| TD ARNI, <i>n</i> (%)           | 21 (11)                           | 16 (17)                  | 5 (5)                        | 0.011           | 13 (10)                                  | 9 (13)                       | 4 (7)                                | 0.258           |
| TD βB, <i>n</i> (%)             | 69 (36)                           | 51 (54)                  | 18 (19)                      | <0.001          | 47 (38)                                  | 34 (51)                      | 13 (22)                              | 0.002           |
| TD MRA, <i>n</i> (%)            | 111 (58)                          | 63 (66)                  | 48 (50)                      | 0.028           | 81 (65)                                  | 47 (70)                      | 34 (59)                              | 0.194           |
| TD Triple therapy, <i>n</i> (%) | 31 (16)                           | 23 (24)                  | 8 (8)                        | 0.003           | 22 (18)                                  | 15 (22)                      | 7 (12)                               | 0.161           |
| CRT-P/CRT-D, <i>n</i> (%)       | 39 (20)                           | 30 (32)                  | 9 (9)                        | <0.001          | 18 (14)                                  | 11 (16)                      | 7 (12)                               | 0.612           |
| ICD, <i>n</i> (%)               | 44 (23)                           | 27 (28)                  | 17 (18)                      | 0.088           | 36 (29)                                  | 23 (34)                      | 13 (22)                              | 0.168           |

ACEi: angiotensin-converting enzyme inhibitor; ARB: angiotensin receptor blocker; ARNI: angiotensin receptor neprilysin inhibitor; βB: beta-blocker; CRT-P/CRT-D: cardiac resynchronization therapy pacemaker/defibrillator; eGFR: estimated glomerular filtration rate; HFOC: heart failure outpatient care; ICD: implantable cardioverter defibrillator; LVEF: left ventricular ejection fraction; MRA: mineralocorticoid receptor antagonist; PSM: propensity-score matching; RASi: renin-angiotensin system inhibitor; SGLT2i: sodium-glucose cotransporter 2 inhibitor; TD: target dose.

**Table S3.** Predictors of 1-year all-cause mortality and 1-year all-cause rehospitalization using univariate Cox regression analysis.

| 1-year all-cause mortality                              |              |              |              |                  |
|---------------------------------------------------------|--------------|--------------|--------------|------------------|
|                                                         | HR           | 95% CI       |              | p-Value          |
| <b>Age (/1 year)</b>                                    | <b>1.058</b> | <b>1.034</b> | <b>1.083</b> | <b>&lt;0.001</b> |
| Female gender                                           | 1.084        | 0.600        | 1.959        | 0.789            |
| Heart rate (/1 min <sup>-1</sup> )                      | 0.992        | 0.980        | 1.004        | 0.215            |
| <b>Systolic blood pressure (/1 mmHg)</b>                | <b>0.983</b> | <b>0.971</b> | <b>0.996</b> | <b>0.012</b>     |
| <b>eGFR at discharge (/1 mL/min/1.73 m<sup>2</sup>)</b> | <b>0.975</b> | <b>0.963</b> | <b>0.987</b> | <b>&lt;0.001</b> |
| Potassium at admission > 4.5 mmol/L                     | 1.068        | 0.632        | 1.805        | 0.807            |
| Left ventricular ejection fraction (/1%)                | 0.991        | 0.953        | 1.030        | 0.648            |
| <b>Diabetes</b>                                         | <b>1.721</b> | <b>1.019</b> | <b>2.908</b> | <b>0.042</b>     |
| Hypertension                                            | 1.485        | 0.832        | 2.653        | 0.181            |
| <b>Atrial fibrillation/flutter</b>                      | <b>1.986</b> | <b>1.162</b> | <b>3.397</b> | <b>0.012</b>     |
| Coronary artery disease                                 | 0.976        | 0.577        | 1.650        | 0.928            |
| CRT at discharge                                        | 1.101        | 0.570        | 2.219        | 0.775            |
| <b>HFOC</b>                                             | <b>0.412</b> | <b>0.228</b> | <b>0.744</b> | <b>0.003</b>     |
| <b>Triple therapy at discharge</b>                      | <b>0.286</b> | <b>0.169</b> | <b>0.484</b> | <b>&lt;0.001</b> |
| 1-year all-cause rehospitalization                      |              |              |              |                  |
|                                                         | HR           | 95% CI       |              | p-Value          |
| <b>Age (/1 year)</b>                                    | <b>1.025</b> | <b>1.009</b> | <b>1.041</b> | <b>0.002</b>     |
| Female gender                                           | 0.677        | 0.409        | 1.118        | 0.127            |
| Heart rate (/1 min <sup>-1</sup> )                      | 1.001        | 0.992        | 1.009        | 0.899            |
| Systolic blood pressure (/1 mmHg)                       | 0.999        | 0.990        | 1.008        | 0.784            |
| <b>eGFR at discharge (/1 mL/min/1.73 m<sup>2</sup>)</b> | <b>0.988</b> | <b>0.979</b> | <b>0.998</b> | <b>0.013</b>     |
| Potassium at discharge > 4.5 mmol/L                     | 0.790        | 0.526        | 1.187        | 0.257            |
| Left ventricular ejection fraction (/1%)                | 0.992        | 0.964        | 1.021        | 0.603            |
| <b>Diabetes</b>                                         | <b>1.438</b> | <b>0.961</b> | <b>2.151</b> | <b>0.077</b>     |
| Hypertension                                            | 1.223        | 0.800        | 1.869        | 0.354            |
| <b>Atrial fibrillation/flutter</b>                      | <b>1.405</b> | <b>0.942</b> | <b>2.098</b> | <b>0.096</b>     |
| Coronary artery disease                                 | 1.347        | 0.902        | 2.011        | 0.146            |
| CRT at discharge                                        | 0.840        | 0.484        | 1.457        | 0.534            |
| <b>HFOC</b>                                             | <b>0.619</b> | <b>0.410</b> | <b>0.934</b> | <b>0.022</b>     |
| <b>Triple therapy at discharge</b>                      | <b>0.463</b> | <b>0.300</b> | <b>0.715</b> | <b>0.001</b>     |

CI: confidence interval; CRT: cardiac resynchronization therapy; eGFR: estimated glomerular filtration rate; HFOC: heart failure outpatient care; HR: hazard ratio. The predictors proven are marked as bold.
